# Supplementary material for: The neuroprotective effects of SFGDI on sirtuin 3-related oxidative stress by regulating the Sirt3/SOD/ROS pathway and energy metabolism in BV2 cells
Source: Royal Society of Chemistry journal article supplement (doi:10.1039/d4fo01512f), 2024-01-01
Supplement: d4fo01512f1.pdf [file d4fo01512f1.pdf]

Purity identification of SFGDI by HPLC

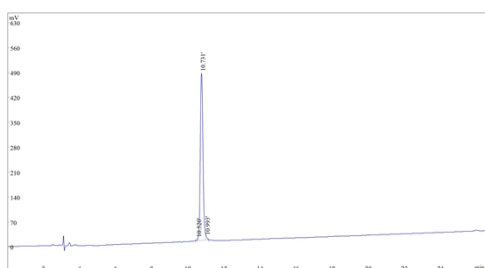

Purity identification of SFGDI by HPLC/MS

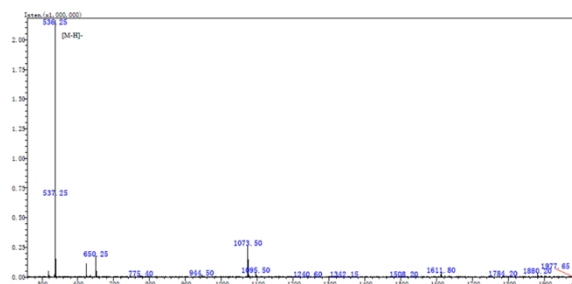

Purity identification of FITC-SFGDI by HPLC

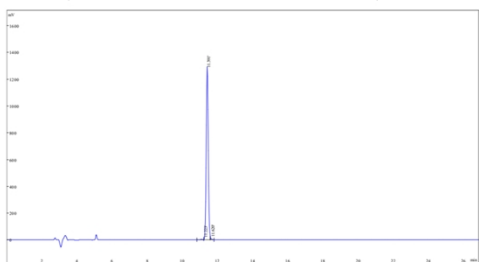

Purity identification of FITC-SFGDI by HPLC/MS

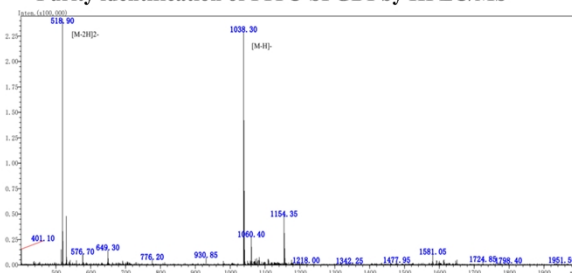

**Figure S1.** The purity information of Serine-Phenylalanine-Glycine-Aspartic-Isoleucine (SFGDI) and fluorescein isothiocyanate-6-Aminocaproic acid-Serine-Phenylalanine-Glycine-Aspartic-Isoleucine (FITC-SFGDI) by HPLC and HPLC-MS
